# Supplementary material
Source: PubMed Central journal article supplement (PMC2928930)
Supplement: emm-42-574-s001.pdf [file emm-42-574-s001.pdf]

## Supplemental Data

### Figure S1.

(A) Cell death rates of HFFS-control and HFFS-TERT cells grown in the presence and absence of doxorubicin (1  $\mu$ M, 12 hr) are determined by trypan blue staining.

(B) Cell death rates of HFFS-control and HFFS-bFGF full length (FL) cells grown in the presence and absence of doxorubicin (1  $\mu$ M, 12 hr) are determined by trypan blue staining.

(C) Expression levels of bFGF mRNA and phosphorylated ERK1/2 proteins are decreased in the bFGF-shRNA vector-transduced HFFS-TERT cells (HFFS-TERT-shbFGF cells, left panel).

(D) Expression levels of TERT and bFGF mRNAs as well as phosphorylated ERK1/2 proteins are decreased in the TERT-shRNA vector-transduced HeLa cells (HeLa-shTERT cells).

(E) *In vivo* tumor formation potentials of HeLa-shScramble, HeLa-shTERT and HeLa-shbFGF cells were determined by injecting  $1 \times 10^6$  indicated cells into nude mouse subcutaneously (n = 6).

(F) Expression levels of TERT mRNA in U87MG-shScramble, U87MG-shTERT, U87MG-control, and U87MG-TERT-D712A cells were determined by semi-quantitative RT-PCR. Overexpression of a dominant negative p53 mutant (p53DD) protein in the U87MG cells was determined by Western blot analysis. The  $\beta$ -actin was used for an equal loading control.

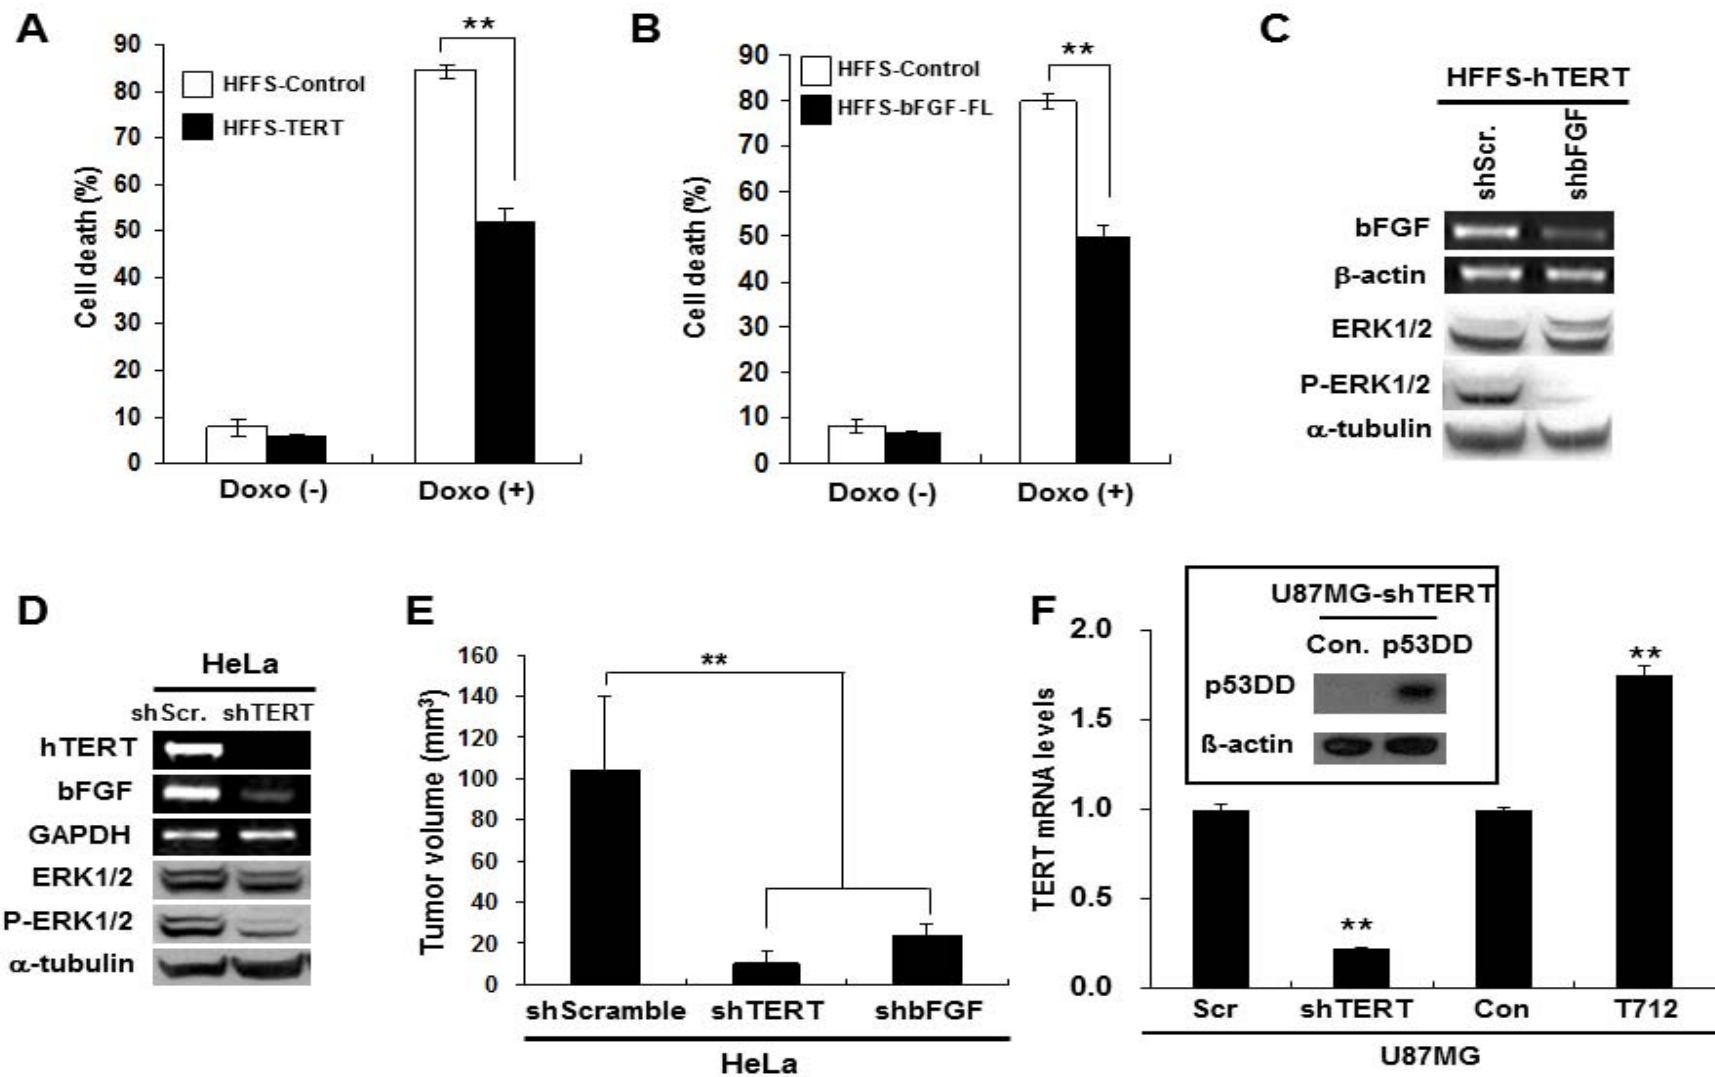

Supplementary Figure 1
